## Review

## Targeting monocytes/macrophages in the treatment of rheumatoid arthritis

Jean-Luc Davignon<sup>1,2,3,4</sup>, Myriam Hayder<sup>1,2,3</sup>, Michel Baron<sup>1,2,3</sup>,  
Jean-Frédéric Boyer<sup>1,2,3,4</sup>, Arnaud Constantin<sup>4,5</sup>, Florence Apparailly<sup>6</sup>,  
Rémy Poupot<sup>1,2,3</sup> and Alain Cantagrel<sup>1,2,3,4</sup>

## Abstract

Biotherapies have revolutionized the treatment of RA. However, much work is needed to understand all the mechanisms of these biotherapies, and alternatives are needed to circumvent adverse effects and the high cost of these long-lasting treatments. In this article we outline some of the approaches we have used to target monocytes/macrophages as major components of inflammation and bone homeostasis. We also discuss how anti-TNF- $\alpha$  antibodies target monocytes/macrophages in the complex mechanisms contributing to inhibition of inflammation.

**Key words:** monocytes, RA, inflammation, novel therapies, biotherapies, targeting, TNF- $\alpha$ , siRNA, cPLA<sub>2</sub> $\alpha$ , dendrimer, animal models.

## Introduction

RA presents with multiple manifestations of inflammation that are due to complex causes [1]. Many different cell components are involved in the development of inflammation, including neutrophils, mastocytes, T and B lymphocytes, and monocytes/macrophages. Activation of these cells leads to the production of cytokines and mediators responsible for inflammation. TNF- $\alpha$  has been shown to be the master element of inflammation in RA [2, 3]. Accordingly, therapies aimed at blocking this cytokine have emerged as a major tool in the treatment of RA [1]. Biotherapies have thus revolutionized the treatment of RA [4]. MAbs and soluble receptors are targeting major inflammatory cytokines [5] as well as T- and B-cell populations of the immune system, thus inhibiting inflammation [6].

Monocytes/macrophages are central to the pathophysiology of inflammation [7] as well as atherosclerosis [8]. More specifically, they have been found to be activated in RA [9, 10] and to massively infiltrate inflammatory sites [11], i.e. synovial membranes in RA [12, 13] and produce

TNF- $\alpha$  [13]. This activation has led to the identification of genes activated in monocytes from RA patients [14]. There is an increase of CD14<sup>+</sup>/CD16<sup>+</sup> monocytes in blood from RA patients [15]. Whether this increase reflects or contributes to the pathogenesis of monocytes/macrophages is unknown. But the increase of soluble CD14 in RA relates to the activation of monocytes/macrophages [16, 17]. The depletion of monocytes using specific antibodies [18] can prevent their presence in the pannus [19] and thus attenuate inflammation.

In addition to their central role in inflammation, monocytes/macrophages are at the origin of pathological bone erosion in RA due to their excessive differentiation into osteoclasts (OCs), which are the only cells specialized in bone resorption [20]. Their differentiation is mediated by two major cytokines, M-CSF and RANKL (receptor activator of nuclear factor  $\kappa$ B ligand). M-CSF binds to its receptor c-FMS, (cellular-feline McDonough strain sarcoma virus oncogene homologue, or CSF-1 receptor, or CD115), which in turn induces the expression of RANK on monocytes. RANKL expression by synovial fibroblasts is induced by pro-inflammatory cytokines such as TNF- $\alpha$ , IL-1, IL-6 and IL-17 [21]. Thus bone homeostasis is modulated by inflammation and immunological events. The concept of osteoimmunology emerged a few years ago to account for the interplay between the bone and immune systems [20, 22]. Monocytes/macrophages are thus ideal targets to influence osteoclastogenesis in inflammation.

Complex cell interactions are involved in all immunological processes. Cytokine stimulation of T lymphocytes

<sup>1</sup>INSERM, U1043, <sup>2</sup>CNRS, U5282, <sup>3</sup>Centre de Physiopathologie de Toulouse Purpan, Université de Toulouse, UPS, <sup>4</sup>Centre de Rhumatologie, Centre Hospitalier Universitaire de Toulouse, Hôpital Purpan, <sup>5</sup>INSERM U1027, Toulouse F-31400 and <sup>6</sup>INSERM U 844, Hôpital Saint Eloi, and Université Montpellier I, Montpellier, France.

Submitted 6 June 2012; revised version accepted 25 September 2012.

Correspondence to: Jean-Luc Davignon, UMR INSERM 1043, CPTP, CHU Purpan, 1 Place Baylac, 31300 Toulouse, France.  
E-mail: jean-luc.davignon@inserm.fr

regulates the production of TNF- $\alpha$  by monocytes/macrophages and modulates their plasticity [23–25]. This may have significance in RA pathogenesis due to the importance of T-cell activation [26]. For example, in RA, monocytes/macrophages from inflamed joints have been shown to induce the development of Th17, thus contributing to the amplification of inflammation [27], and T-monocyte contact is involved in cartilage destruction [28]. These studies exemplify the importance of targeting T-monocyte/macrophage interaction [29]. In this respect, as monocytes/macrophages are considered to be antigen presenting cells, CTLA4-Ig (abatacept) acts by blocking this interaction [26, 30].

Blocking TNF- $\alpha$  was shown to result in the inhibition of IL-1 $\beta$ , IL-6 and IL-8 production, thus putting TNF- $\alpha$  centre stage of inflammatory cytokine regulation and thus providing a rationale for the use of anti-TNF reagents [3, 31]. TNF- $\alpha$  is a transmembrane protein that needs cleavage by TNF- $\alpha$  converting enzyme (TACE) to be released as a soluble cytokine [32–34]. In monocytes/macrophages, reverse signalling occurs through transmembrane TNF- $\alpha$  (tmTNF- $\alpha$ ) and regulates cell-cell interaction [35]. This reverse signalling may also explain some of the effects of anti-TNF drugs [36]. Thus, in addition to blocking soluble TNF- $\alpha$ , anti-TNF reagents may act through the interaction with tmTNF- $\alpha$  [37].

While TNF- $\alpha$  is produced in large quantities by monocytes/macrophages and is a direct effector of inflammation, it can also activate cytosolic phospholipase A<sub>2</sub> $\alpha$  (cPLA<sub>2</sub> $\alpha$ ) [38]. This enzyme is strongly expressed in monocytes/macrophages and hydrolyses phospholipids into arachidonic acid with subsequent activation of cyclo-oxygenase and PG synthases [39]. This pathway generates lipids such as PGs and leucotrienes that have been shown to induce and maintain inflammation. Besides inflammation, cPLA<sub>2</sub> $\alpha$  is an important regulator of bone resorption [40].

Targeting monocytes/macrophages should be a powerful way of inhibiting inflammation and bone erosion in arthritis. Their plasticity is a major property that helps the switch from a pro-inflammatory phenotype (M1) to an anti-inflammatory state (M2) [41]. In this review we highlight some of approaches we have used to target monocytes/macrophages and treat experimental arthritis, as well as potential consequences of anti-TNF biotherapy on monocyte/macrophage inflammation and osteoclastogenesis. Identifying molecular targets within this cell population will help in creating new therapeutic solutions.

### Inhibition of cPLA<sub>2</sub> $\alpha$ in monocytes/macrophages using lipoplexes as siRNA vectors

Recently a new generation of vectors that target the mononuclear phagocyte system has been developed [42–45]. These vectors, called lipoplexes, allow for the delivery of small interfering RNA (siRNA) specific for various molecular targets. Lipoplexes, as well as other techniques, have been used for the silencing of inflammatory

Fig. 1 Targeting monocyte using lipoplexes.

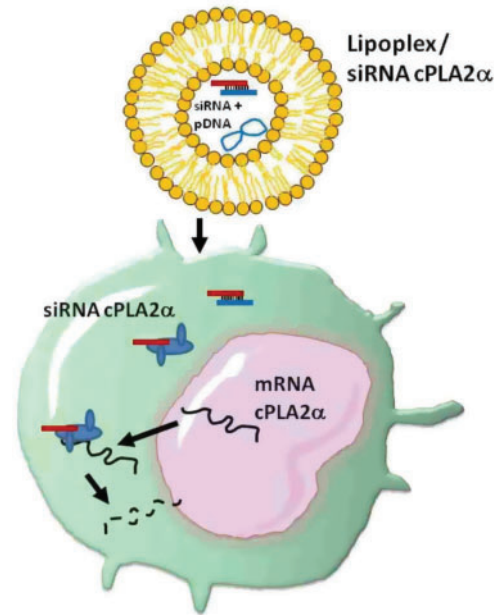

siRNAs are incorporated into lipoplexes combined with plasmid DNA as a carrier. siRNAs are then associated with the Risc complex, leading to degradation of specific mRNA. Specific cPLA<sub>2</sub> $\alpha$  inhibition is depicted.

cytokines [42, 46]. Our approach was to target a specific cytosolic phospholipase A<sub>2</sub>, cPLA<sub>2</sub> $\alpha$ , in order to inhibit the cascade involved in the production of PGs in monocytes/macrophages [47]. Among the huge family of phospholipase A<sub>2</sub> enzymes, cPLA<sub>2</sub> $\alpha$  is one of the most expressed and active in monocytes/macrophages [48]. Several papers have pointed out the increase in cPLA<sub>2</sub> $\alpha$  in systemic inflammation and cancer [49, 50]. Inhibiting its activity with small synthetic molecules has helped in finding the importance of cPLA<sub>2</sub> $\alpha$  in arthritis [51] and experimental autoimmune encephalomyelitis [52].

In our published experiments [47], the cPLA<sub>2</sub> $\alpha$  siRNA distribution was associated with a reduced cPLA<sub>2</sub> $\alpha$  expression and activity within spleen monocytes/macrophages and inflamed joints, and pro-inflammatory cytokines such as TNF- $\alpha$  and IFN- $\gamma$  were also attenuated. Histology showed that there was a near-complete inhibition of cell infiltration in joints from mice treated with cPLA<sub>2</sub> $\alpha$  lipoplexes. This resulted in a significant reduction of arthritis as measured by paw swelling as well as arthritis score. Fig. 1 depicts the lipoplex–siRNA approach.

The gene knock-out approach showed that mice deficient in cPLA<sub>2</sub> $\alpha$  are resistant to CIA [53]. Antisense oligonucleotides have also been used [54]. However, knocking out genes without cell targeting implies blocking specific gene expression in all cells, whatever the cell lineage is [55]. Thus silencing a key producer of pro-inflammatory lipid mediator within a specific cell type such as monocytes/macrophages may help to focus on key effectors

**Fig. 2** Illustration of reverse signalling by anti-TNF drugs.

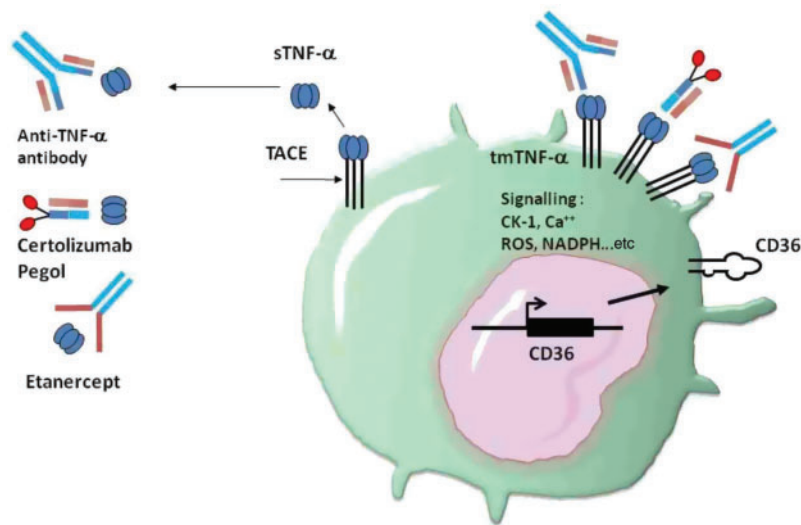

Inhibition of soluble TNF- $\alpha$  as well as of tmTNF- $\alpha$ : induction of CD36 expression as an illustration of reverse signalling through tmTNF- $\alpha$  induced by antibodies (remicade, adalimumab, golimumab) as well as by soluble receptor (etanercept) and pegylated Fab fragment (certolizumab pegol). CK-1: creatine kinase 1; ROS: reactive oxygen species.

and avoid potential side effects by excluding the targeting of other cell types.

### Monocyte/macrophage tmTNF- $\alpha$ as a target of biotherapy

The use of anti-TNF reagents as a biotherapy has massively reduced the burden of inflammation and bone erosion in good responders [56]. However, a proportion of patients remain resistant to anti-TNF treatments [50]. Three major types of anti-TNF drug have been developed: antibody (fully human or humanized), soluble receptor and single immunoglobulin chain [57]. All (infliximab, etanercept, adalimumab, certolizumab pegol, golimumab) bind to soluble TNF. It is generally admitted that blocking soluble TNF- $\alpha$  is the major mechanism for decreasing inflammation. However, since TNF- $\alpha$  exists also as a transmembrane protein, blocking its soluble part may not be the only way to block functional activity of TNF- $\alpha$  with antibodies.

Soluble TNF- $\alpha$  is released from tmTNF- $\alpha$  through cleavage by the enzyme TACE [34]. Processing of the cytoplasmic portion of TNF- $\alpha$  also occurs through protease SPPL2b in dendritic cells [58–60]. The intracellular part of TNF- $\alpha$  migrates to the nucleus, probably due to its putative nuclear localization sequence and signals that involve Ca<sup>2+</sup> [58]. Again, those signals may be different depending on the anti-TNF. Numerous reports have indicated that tmTNF- $\alpha$  can transmit signals to monocytes/macrophages [37, 58, 59, 61–63]. This is called reverse signalling. Thus therapeutic antibodies can block soluble TNF- $\alpha$  as well as participate in cell signalling through binding to tmTNF- $\alpha$  [64–66].

We have shown that anti-TNF reagents induce an increase of CD36 in monocytes/macrophages. The mechanism involves redox signalling via NADPH oxidase activation [62]. Since CD36 is a scavenger receptor involved in the transport of cholesterol, this increase is relevant to the development of atherosclerosis as a complication of RA [75, 76]. This increase may be related to the lower incidence of atherosclerosis in RA patients treated with anti-TNF [77, 78]. How the increase of CD36 participates in the pathophysiology of atherosclerosis in RA will require clinical studies. Although we have concentrated on CD36, several other markers may be modified in monocytes/macrophages by reverse signalling. This is being investigated in our laboratory. Differences in reverse signalling with anti-TNF drugs may be due to structural differences of various anti-TNFs and may explain disparate adverse effects regarding tuberculosis [79–81] and disparate efficacy in inflammatory bowel disease [36, 63]. These differences could also modulate inhibition of nuclear factor- $\kappa$ B (NF- $\kappa$ B) and suppression of IL-1 $\beta$  responses in monocytes/macrophages [37], as well as induction of Tregs by dendritic cells [82]. A schematic description of various anti-TNF and reverse signalling is depicted in Fig. 2.

Thus targeting monocytes/macrophages with various anti-TNF reagents will result in different outcomes. Predicting these outcomes and understanding how anti-TNF drugs target monocytes/macrophages and orient them towards specific phenotypes may help choose the most appropriate and most beneficial treatment for the patient.

However, cells other than monocytes/macrophages can express tmTNF- $\alpha$ . On T cells, tmTNF- $\alpha$  signalling has been shown to induce E-selectin expression [63, 83, 84].

**Fig. 3** Inhibition of OC differentiation and of inflammation by dendrimer ABP.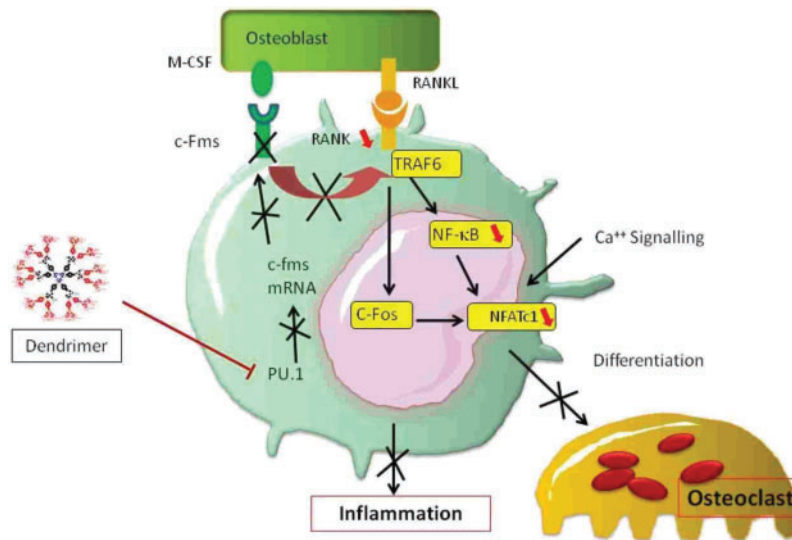

Dendrimer is internalized by monocyte and inhibits the expression of c-FMS mRNA downstream to PU.1 inhibition. Subsequently RANK and NFATc1 induction is impaired, leading to inhibition of OC differentiation. Production of pro-inflammatory cytokines is inhibited and inflammation is reduced.

On the other hand, blocking tmTNF- $\alpha$  on T cells decreases TNF- $\alpha$  production by monocytes/macrophages [84]. Thus the tmTNF- $\alpha$  pathway is most suitable for the inhibition of monocyte activation.

### Inhibition of c-FMS in monocytes/macrophages using phosphorus-based dendrimer

Dendrimers are highly branched tree-like polymers, with precisely defined structure and molecular weight. Their surface multivalency allows for polyvalent interactions with cellular and molecular targets. Phosphorus-based dendrimer aminobisphosphonate (ABP) has been described to possess anti-inflammatory properties [85–87].

The main cellular target of dendrimer ABP has been found to be monocytes/macrophages [88]. Internalization of dendrimer occurs through a rapid process whose molecular mechanism is not yet deciphered. Although the receptors of dendrimer ABP are as yet unknown, some of its molecular targets have been identified [85, 88]. Interaction of dendrimer with monocytes/macrophages induces a decrease of c-FMS cell surface expression as well as mRNA expression [85]. PU.1 expression, which controls c-FMS, is also decreased. Inflammation, arthritis score paw swelling and bone resorption were dramatically reduced in two experimental models, IL-1 ra $^{-/-}$  and K/BxN serum-induced arthritis [85]. More targets are probably to be identified, but the decrease of c-FMS expression can explain at least part of the effects of dendrimer ABP observed on osteoclastogenesis and inflammation.

The interaction of M-CSF with its receptor c-FMS induces a cascade of signals that is indispensable for

osteoclastogenesis [89]. RANK expression is induced by the interaction of M-CSF with its receptor c-FMS, leading to subsequent recruitment of TRAF6 [20]. These signalling events ultimately lead to NF- $\kappa$ B and nuclear factor of activated T cells (NFATc1) activation mediating inflammation and osteoclastogenesis [20]. Thus targeting c-FMS may be a good way to reduce both inflammation and osteoclastogenesis.

To this end, multiple reagents have been developed: inhibitor of c-FMS kinase imatinib has been shown to promote bone growth in experimental arthritis [90] and bone loss in chronic myeloid leukaemia [91, 92], but it targets platelet-derived growth factor receptor (PDGFR) as well as c-FMS. This may have adverse consequences. Other inhibitors of kinases have been reported [93–95].

An antibody specific for c-FMS has been used in an experimental model of TNF- $\alpha$ -induced bone erosion [96] in lipopolysaccharide-induced osteoclastogenesis [97] and in mouse models of RA [98]. However, other antibodies directed towards c-FMS have been shown to either block inflammation [99] or not [100] in models of peritonitis and lung inflammation. This may depend on the type of mAb. Neutralizing mAb specific for M-CSF reduced the severity of established CIA, and M-CSF-deficient op/op mice were resistant to CIA induction [101]. These reports argue strongly in favour of the importance of the M-CSF pathway in inflammation and osteoclastogenesis. Targeting CSF in inflammation and autoimmunity has been considered [102].

A link will have to be found to connect interaction with a putative receptor for the dendrimer ABP and with its molecular targets. Whether dendrimer ABP modifies the expression of other molecules in monocytes/macrophages needs to be demonstrated. Fig. 3 depicts

the current view of the putative mechanism of action for dendrimer ABP.

## Discussion

Monocytes/macrophages link adaptive and innate immunity. Although monocytes/macrophages are central to inflammation, none of the current biotherapies specifically target monocytes/macrophages in RA. Their plasticity [41, 103] makes them an ideal target for the treatment of inflammation, especially arthritis. We have been interested in this cell lineage to search for possibilities for treating arthritis.

Our work has focused on potential experimental therapeutics against arthritis by targeting monocytes/macrophages cPLA<sub>2</sub> $\alpha$  and OC differentiation using, respectively, lipoplexes and dendrimers. Another goal was the understanding of the effect of currently available drugs on reverse signalling in monocytes/macrophages (anti-TNF). The effect of anti-TNF reagents on tmTNF- $\alpha$  will have to be taken into account. Imbalance regarding the production of cytokines by monocytes/macrophages in response to tmTNF- $\alpha$  signalling could account for various phenotypes observed in patients undergoing anti-TNF biotherapy.

Higher expression of tmTNF in monocytes from RA patients compared with healthy donors was reported [37]. A decrease in IL-1 $\beta$  production by infliximab and an increase in apoptosis by tmTNF were observed in RA compared with healthy donors. Thus reverse signalling is expected to be a potent regulator of signalling in monocytes from RA patients.

Reverse signalling may also explain the absence of granulomatous infections in patients treated with etanercept, whereas this is a complication of treatment with anti-TNF antibodies [36, 58]. Another example of potential reverse signalling is anti-inflammatory response mediated by infliximab but not by etanercept in Jurkat T cells [63].

Gene expression in the blood and synovium from patients treated with infliximab can also be predictive of the response to treatment [67, 71–74]. Again, reverse signalling may account for these modifications. However, the mechanisms responsible for response and non-response to anti-TNF antibody treatment are not fully understood. Anti-infliximab antibodies can be detected in the serum of treated patients. They impair the efficiency of treatment and may be related to the responder/non-responder status of patients [67–70]. However, mechanisms other than neutralization of soluble TNF- $\alpha$  have been suggested to be responsible for the responder/non-responder status [67]. These mechanisms may result from reverse signalling. Experiments are under way to test for the molecular and cellular consequences of various anti-TNF drugs.

When tested in experimental arthritis, siRNA-cPLA<sub>2</sub> $\alpha$ -lipoplexes as well as dendrimers were efficient at reducing inflammation and joint destruction. However, lipoplexes needed to be combined to a specific inhibitory element, siRNA [44, 104]. We used cPLA<sub>2</sub> $\alpha$  siRNA to specifically target the PG pathway in monocytes/macrophages [47]. This resulted in decreased production of TNF- $\alpha$  and IFN- $\gamma$ ,

but not IL-17, suggesting that the inhibition of PGE2 production was sufficient to resolve arthritis even if IL-17 was not down-regulated. Dendrimer ABP, however, possessed intrinsic activity and was much more effective with regard to the inhibition of inflammatory cytokines such as IL-1, IL-6, IL-17 and TNF- $\alpha$ . Dendrimer ABP was also capable of blocking OC differentiation *in vitro* and *in vivo*, thus indicating that the inflammation/osteoclastogenesis pathways were intertwined and thus dampened together. Other types of dendrimer have also been used as carriers of various compounds [105, 106], but their most remarkable properties rely in directly targeting and modulating the function of cell populations [85, 86] and combating viral infection [107, 108]. Although it is established that the monocyte is the most important target cell population of dendrimer ABP, no data are yet available regarding the cellular receptors. Identifying a receptor may help predict some of the properties of dendrimer ABP on monocytes/macrophages.

Various therapies are targeting T-cell function (CTLA4-Ig, [26]), B cells (anti-CD20, [109]) and cytokines such as TNF- $\alpha$ , IL-6, IL-17 and IL-1. The use of anti-CD20 antibodies has highlighted the role of B cells in the treatment of RA. Its efficacy has been reported to be due at least in part to reduction of the Th17 response [110] and the removal of short-lived autoreactive plasma cells in a mouse model of RA [111]. T and B cells are central to adaptive immunity, but so far, no autoimmune-specific antigen of these cells in RA has been used as a drug target. In particular, although ACPAs are currently used for the diagnosis of RA [112], and are probably involved in the pathogenesis of RA [113], no treatment is yet aimed at these immunological specificities.

In conclusion, although current biotherapies have changed the outcome and complications of RA, alternatives are worth considering. In this respect, monocytes/macrophages are strong candidates as targets in the treatment of RA. Their central role in inflammation and bone homeostasis as well as their plasticity makes them suitable for modulating the cytokine environment in systemic arthritis. Future studies will determine if this approach can be envisaged in other autoimmune diseases as well.

### Rheumatology key messages

- Monocytes are strong candidates as targets in the treatment of RA.
- Lipoplexes and phosphorus-based dendrimers target monocytes in arthritis.
- Anti-TNF may have consequences on monocyte biology in RA through reverse signalling.

**Funding:** From INSERM, CNRS and the Paul Sabatier University Toulouse III Société Française de Rhumatologie, Fondation Arthritis Courtin.

**Disclosure statement:** The authors have declared no conflicts of interest.

## References

- 1 McInnes IB, O'Dell JR. State-of-the-art: rheumatoid arthritis. *Ann Rheum Dis* 2010;69:1898–906.
- 2 McInnes IB, Schett G. The pathogenesis of rheumatoid arthritis. *N Engl J Med* 2011;365:2205–19.
- 3 Brennan FM, Chantry D, Jackson A, Maini R, Feldmann M. Inhibitory effect of TNF alpha antibodies on synovial cell interleukin-1 production in rheumatoid arthritis. *Lancet* 1989;2:244–7.
- 4 Stoll JG, Yasothan U. Rheumatoid arthritis market. *Nat Rev Drug Discov* 2009;8:693–4.
- 5 Kopf M, Bachmann MF, Marsland BJ. Averting inflammation by targeting the cytokine environment. *Nat Rev Drug Discov* 2010;9:703–18.
- 6 Buch MH, Emery P. New therapies in the management of rheumatoid arthritis. *Curr Opin Rheumatol* 2011;23:245–51.
- 7 Gordon S, Taylor PR. Monocyte and macrophage heterogeneity. *Nat Rev Immunol* 2005;5:953–64.
- 8 Libby P, Ridker PM, Hansson GK. Progress and challenges in translating the biology of atherosclerosis. *Nature* 2011;473:317–25.
- 9 Liote F, Boval-Boizard B, Weill D, Kuntz D, Wautier JL. Blood monocyte activation in rheumatoid arthritis: increased monocyte adhesiveness, integrin expression, and cytokine release. *Clin Exp Immunol* 1996;106:13–9.
- 10 Torsteinsdottir I, Arvidson NG, Hallgren R, Hakansson L. Monocyte activation in rheumatoid arthritis (RA): increased integrin, Fc gamma and complement receptor expression and the effect of glucocorticoids. *Clin Exp Immunol* 1999;115:554–60.
- 11 Swirski FK, Nahrendorf M, Etzrodt M *et al.* Identification of splenic reservoir monocytes and their deployment to inflammatory sites. *Science* 2009;325:612–6.
- 12 Burmester GR, Locher P, Koch B *et al.* The tissue architecture of synovial membranes in inflammatory and non-inflammatory joint diseases. I. The localization of the major synovial cell populations as detected by monoclonal reagents directed towards Ia and monocyte-macrophage antigens. *Rheumatol Int* 1983;3:173–81.
- 13 Kinne RW, Stuhlmuller B, Burmester GR. Cells of the synovium in rheumatoid arthritis. *Macrophages. Arthritis Res Ther* 2007;9:224.
- 14 Stuhlmuller B, Ungethum U, Scholze S *et al.* Identification of known and novel genes in activated monocytes from patients with rheumatoid arthritis. *Arthritis Rheum* 2000;43:775–90.
- 15 Kawanaka N, Yamamura M, Aita T *et al.* CD14+,CD16+ blood monocytes and joint inflammation in rheumatoid arthritis. *Arthritis Rheum* 2002;46:2578–86.
- 16 Bas S, Gauthier BR, Spenato U, Stingelin S, Gabay C. Cd14 is an acute-phase protein. *J Immunol* 2004;172:4470–9.
- 17 Yu S, Nakashima N, Xu BH *et al.* Pathological significance of elevated soluble CD14 production in rheumatoid arthritis: in the presence of soluble CD14, lipopolysaccharides at low concentrations activate RA synovial fibroblasts. *Rheumatol Int* 1998;17:237–43.
- 18 Bruhl H, Cihak J, Plachy J *et al.* Targeting of Gr-1+,CCR2+ monocytes in collagen-induced arthritis. *Arthritis Rheum* 2007;56:2975–85.
- 19 Thurlings RM, Wijbrandts CA, Bennink RJ *et al.* Monocyte scintigraphy in rheumatoid arthritis: the dynamics of monocyte migration in immune-mediated inflammatory disease. *PLoS One* 2009;4:e7865.
- 20 Takayanagi H. Osteoimmunology: shared mechanisms and crosstalk between the immune and bone systems. *Nat Rev Immunol* 2007;7:292–304.
- 21 Nakashima T, Takayanagi H. The dynamic interplay between osteoclasts and the immune system. *Arch Biochem Biophys* 2008;473:166–71.
- 22 Takayanagi H. Osteoimmunology and the effects of the immune system on bone. *Nat Rev Rheumatol* 2009;5:667–76.
- 23 Sebbag M, Parry SL, Brennan FM, Feldmann M. Cytokine stimulation of T lymphocytes regulates their capacity to induce monocyte production of tumor necrosis factor-alpha, but not interleukin-10: possible relevance to pathophysiology of rheumatoid arthritis. *Eur J Immunol* 1997;27:624–32.
- 24 Cassetta L, Cassol E, Poli G. Macrophage polarization in health and disease. *Sci World J* 2011;11:2391–402.
- 25 Martinez FO, Sica A, Mantovani A, Locati M. Macrophage activation and polarization. *Front Biosci* 2008;13:453–61.
- 26 Kremer JM, Westhovens R, Leon M *et al.* Treatment of rheumatoid arthritis by selective inhibition of T-cell activation with fusion protein CTLA4Ig. *N Engl J Med* 2003;349:1907–15.
- 27 Evans HG, Gullick NJ, Kelly S *et al.* In vivo activated monocytes from the site of inflammation in humans specifically promote Th17 responses. *Proc Natl Acad Sci USA* 2009;106:6232–7.
- 28 Burger D, Dayer JM. The role of human T-lymphocyte-monocyte contact in inflammation and tissue destruction. *Arthritis Res* 2002;4(Suppl. 3):S169–76.
- 29 Brennan FM, Foey AD, Feldmann M. The importance of T cell interactions with macrophages in rheumatoid cytokine production. *Curr Top Microbiol Immunol* 2006;305:177–94.
- 30 Buch MH, Vital EM, Emery P. Abatacept in the treatment of rheumatoid arthritis. *Arthritis Res Ther* 2008;10(Suppl. 1):S5.
- 31 Butler DM, Maini RN, Feldmann M, Brennan FM. Modulation of proinflammatory cytokine release in rheumatoid synovial membrane cell cultures. Comparison of monoclonal anti TNF-alpha antibody with the interleukin-1 receptor antagonist. *Eur Cytokine Netw* 1995;6:225–30.
- 32 Moss ML, Jin SL, Milla ME *et al.* Cloning of a disintegrin metalloproteinase that processes precursor tumour-necrosis factor-alpha. *Nature* 1997;385:733–6.
- 33 Black RA, Rauch CT, Kozlosky CJ *et al.* A metalloproteinase disintegrin that releases tumour-necrosis factor-alpha from cells. *Nature* 1997;385:729–33.
- 34 Zheng Y, Saftig P, Hartmann D, Blobel C. Evaluation of the contribution of different ADAMs to tumor necrosis factor alpha (TNFalpha) shedding and of the function of the TNFalpha ectodomain in ensuring selective stimulated

- shedding by the TNFalpha convertase (TACE/ADAM17). *J Biol Chem* 2004;279:42898–906.
- 35 Kriegler M, Perez C, DeFay K, Albert I, Lu SD. A novel form of TNF/cachectin is a cell surface cytotoxic transmembrane protein: ramifications for the complex physiology of TNF. *Cell* 1988;53:45–53.
- 36 Mitoma H, Horiuchi T, Tsukamoto H *et al.* Mechanisms for cytotoxic effects of anti-tumor necrosis factor agents on transmembrane tumor necrosis factor alpha-expressing cells: comparison among infliximab, etanercept, and adalimumab. *Arthritis Rheum* 2008;58:1248–57.
- 37 Meusch U, Rossol M, Baerwald C, Hauschildt S, Wagner U. Outside-to-inside signaling through transmembrane tumor necrosis factor reverses pathologic interleukin-1beta production and deficient apoptosis of rheumatoid arthritis monocytes. *Arthritis Rheum* 2009;60:2612–21.
- 38 Leslie CC. Properties and regulation of cytosolic phospholipase A2. *J Biol Chem* 1997;272:16709–12.
- 39 Hara S, Kamei D, Sasaki Y *et al.* Prostaglandin E synthases: understanding their pathophysiological roles through mouse genetic models. *Biochimie* 2010;92:651–9.
- 40 Bonventre J. Cytosolic phospholipase A2alpha reigns supreme in arthritis and bone resorption. *Trends Immunol* 2004;25:116–9.
- 41 Mantovani A, Sica A, Sozzani S *et al.* The chemokine system in diverse forms of macrophage activation and polarization. *Trends Immunol* 2004;25:677–86.
- 42 Presumey J, Duroux-Richard I, Courties G, Apparailly F. Cationic liposome formulations for RNAi-based validation of therapeutic targets in rheumatoid arthritis. *Curr Opin Mol Ther* 2010;12:325–30.
- 43 Rhinn H, Largeau C, Bigey P *et al.* How to make siRNA lipoplexes efficient? Add a DNA cargo. *Biochim Biophys Acta* 2009;1790:219–30.
- 44 Courties G, Seiffart V, Presumey J *et al.* In vivo RNAi-mediated silencing of TAK1 decreases inflammatory Th1 and Th17 cells through targeting of myeloid cells. *Blood* 2010;116:3505–16.
- 45 Schlegel A, Largeau C, Bigey P *et al.* Anionic polymers for decreased toxicity and enhanced in vivo delivery of siRNA complexed with cationic liposomes. *J Control Release* 2011;152:393–401.
- 46 Leuschner F, Dutta P, Gorbato R *et al.* Therapeutic siRNA silencing in inflammatory monocytes in mice. *Nat Biotechnol* 2011;29:1005–10.
- 47 Courties G, Baron M, Presumey J *et al.* Cytosolic phospholipase A2alpha gene silencing in the myeloid lineage alters development of Th1 responses and reduces disease severity in collagen-induced arthritis. *Arthritis Rheum* 2011;63:681–90.
- 48 Dennis EA. Diversity of group types, regulation, and function of phospholipase A2. *J Biol Chem* 1994;269:13057–60.
- 49 Levy R, Dana R, Hazan I *et al.* Elevated cytosolic phospholipase A(2) expression and activity in human neutrophils during sepsis. *Blood* 2000;95:660–5.
- 50 Patel MI, Singh J, Niknami M *et al.* Cytosolic phospholipase A2-alpha: a potential therapeutic target for prostate cancer. *Clin Cancer Res* 2008;14:8070–9.
- 51 Tai N, Kuwabara K, Kobayashi M *et al.* Cytosolic phospholipase A2 alpha inhibitor, pyrroxyphene, displays anti-arthritic and anti-bone destructive action in a murine arthritis model. *Inflamm Res* 2010;59:53–62.
- 52 Marusic S, Thakker P, Pelker JW *et al.* Blockade of cytosolic phospholipase A2 alpha prevents experimental autoimmune encephalomyelitis and diminishes development of Th1 and Th17 responses. *J Neuroimmunol* 2008;204:29–37.
- 53 Hegen M, Sun L, Uozumi N *et al.* Cytosolic phospholipase A2alpha-deficient mice are resistant to collagen-induced arthritis. *J Exp Med* 2003;197:1297–302.
- 54 Raichel L, Berger S, Hadad N *et al.* Reduction of cPLA2alpha overexpression: an efficient anti-inflammatory therapy for collagen-induced arthritis. *Eur J Immunol* 2008;38:2905–15.
- 55 Bonventre JV, Huang Z, Taheri MR *et al.* Reduced fertility and postischaemic brain injury in mice deficient in cytosolic phospholipase A2. *Nature* 1997;390:622–5.
- 56 Feldmann M, Maini RN. Anti-TNF therapy, from rationale to standard of care: What lessons has it taught us? *J Immunol* 2010;185:791–4.
- 57 Thalayasingam N, Isaacs JD. Anti-TNF therapy. *Best Pract Res Clin Rheumatol* 2011;25:549–67.
- 58 Horiuchi T, Mitoma H, Harashima S, Tsukamoto H, Shimoda T. Transmembrane TNF-alpha: structure, function and interaction with anti-TNF agents. *Rheumatology* 2010;49:1215–28.
- 59 Friedmann E, Hauben E, Maylandt K *et al.* SPPL2a AND SPPL2b promote intramembrane proteolysis of TNFalpha in activated dendritic cells to trigger IL-12 production. *Nat Cell Biol* 2006;8:843–8.
- 60 Fluhner R, Grammer G, Israel L *et al.* A gamma-secretase-like intramembrane cleavage of TNFalpha by the GxGD aspartyl protease SPPL2b. *Nat Cell Biol* 2006;8:894–6.
- 61 Domonkos A, Udvardy A, Laszlo L, Nagy T, Duda E. Receptor-like properties of the 26 kDa transmembrane form of TNF. *Eur Cytokine Netw* 2001;12:411–9.
- 62 Boyer JF, Balard P, Authier H *et al.* Tumor necrosis factor alpha and adalimumab differentially regulate CD36 expression in human monocytes. *Arthritis Res Ther* 2007;9:R22.
- 63 Mitoma H, Horiuchi T, Hatta N *et al.* Infliximab induces potent anti-inflammatory responses by outside-to-inside signals through transmembrane TNF-alpha. *Gastroenterology* 2005;128:376–92.
- 64 Eissner G, Kirchner S, Lindner H *et al.* Reverse signaling through transmembrane TNF confers resistance to lipopolysaccharide in human monocytes and macrophages. *J Immunol* 2000;164:6193–8.
- 65 Kirchner S, Holler E, Haffner S, Andreesen R, Eissner G. Effect of different tumor necrosis factor (TNF) reactive agents on reverse signaling of membrane integrated TNF in monocytes. *Cytokine* 2004;28:67–74.
- 66 Kirchner S, Boldt S, Kolch W *et al.* LPS resistance in monocytic cells caused by reverse signaling through transmembrane TNF (mTNF) is mediated by the MAPK/ERK pathway. *J Leukoc Biol* 2004;75:324–31.

- 67 Sekiguchi N, Kawauchi S, Furuya T *et al.* Messenger ribonucleic acid expression profile in peripheral blood cells from RA patients following treatment with an anti-TNF-alpha monoclonal antibody, infliximab. *Rheumatology* 2008;47:780-8.
- 68 Haraoui B, Cameron L, Ouellet M, White B. Anti-infliximab antibodies in patients with rheumatoid arthritis who require higher doses of infliximab to achieve or maintain a clinical response. *J Rheumatol* 2006;33:31-6.
- 69 Mulleman D, Meric JC, Paintaud G *et al.* Infliximab concentration monitoring improves the control of disease activity in rheumatoid arthritis. *Arthritis Res Ther* 2009;11:R178.
- 70 Pascual-Salcedo D, Plasencia C, Ramiro S *et al.* Influence of immunogenicity on the efficacy of long-term treatment with infliximab in rheumatoid arthritis. *Rheumatology* 2011;50:1445-52.
- 71 Koczan D, Drynda S, Hecker M *et al.* Molecular discrimination of responders and nonresponders to anti-TNF alpha therapy in rheumatoid arthritis by etanercept. *Arthritis Res Ther* 2008;10:R50.
- 72 Lindberg J, af Klint E, Catrina AI *et al.* Effect of infliximab on mRNA expression profiles in synovial tissue of rheumatoid arthritis patients. *Arthritis Res Ther* 2006;8:R179.
- 73 Lindberg J, af Klint E, Ulfgren AK *et al.* Variability in synovial inflammation in rheumatoid arthritis investigated by microarray technology. *Arthritis Res Ther* 2006;8:R47.
- 74 Lindberg J, Wijbrandts CA, van Baarsen LG *et al.* The gene expression profile in the synovium as a predictor of the clinical response to infliximab treatment in rheumatoid arthritis. *PLoS One* 2010;5:e11310.
- 75 Mirjafari H, Al-Husain A, Bruce IN. Cardiovascular risk factors in inflammatory arthritis. *Curr Opin Lipidol* 2011;22:296-301.
- 76 Boyer JF, Gourraud PA, Cantagrel A, Davignon JL, Constantin A. Traditional cardiovascular risk factors in rheumatoid arthritis: a meta-analysis. *Joint Bone Spine* 2011;78:179-83.
- 77 Greenberg JD, Kremer JM, Curtis JR *et al.* Tumour necrosis factor antagonist use and associated risk reduction of cardiovascular events among patients with rheumatoid arthritis. *Ann Rheum Dis* 2010;70:576-82.
- 78 Jacobsson LT, Turesson C, Gulfe A *et al.* Treatment with tumor necrosis factor blockers is associated with a lower incidence of first cardiovascular events in patients with rheumatoid arthritis. *J Rheumatol* 2005;32:1213-8.
- 79 Wallis RS, Broder MS, Wong JY, Hanson ME, Beenhouwer DO. Granulomatous infectious diseases associated with tumor necrosis factor antagonists. *Clin Infect Dis* 2004;38:1261-5.
- 80 Allie N, Alexopoulou L, Quesniaux VJ *et al.* Protective role of membrane tumour necrosis factor in the host's resistance to mycobacterial infection. *Immunology* 2008;125:522-34.
- 81 Harris J, Keane J. How tumour necrosis factor blockers interfere with tuberculosis immunity. *Clin Exp Immunol* 2010;161:1-9.
- 82 Kleijwegt FS, Laban S, Duinkerken G *et al.* Critical role for TNF in the induction of human antigen-specific regulatory T cells by tolerogenic dendritic cells. *J Immunol* 2010;185:1412-8.
- 83 Harashima S, Horiuchi T, Hatta N *et al.* Outside-to-inside signal through the membrane TNF-alpha induces E-selectin (CD62E) expression on activated human CD4+ T cells. *J Immunol* 2001;166:130-6.
- 84 Rossol M, Meusch U, Pierer M *et al.* Interaction between transmembrane TNF and TNFR1/2 mediates the activation of monocytes by contact with T cells. *J Immunol* 2007;179:4239-48.
- 85 Hayder M, Poupot M, Baron M *et al.* A phosphorus-based dendrimer targets inflammation and osteoclastogenesis in experimental arthritis. *Sci Transl Med* 2011;3:81ra35.
- 86 Hayder M, Fruchon S, Fournie JJ, Poupot M, Poupot R. Anti-inflammatory properties of dendrimers per se. *Sci World J* 2011;11:1367-82.
- 87 Fruchon S, Poupot M, Martinet L *et al.* Anti-inflammatory and immunosuppressive activation of human monocytes by a bioactive dendrimer. *J Leukoc Biol* 2009;85:553-62.
- 88 Poupot M, Griffe L, Marchand P *et al.* Design of phosphorylated dendritic architectures to promote human monocyte activation. *FASEB J* 2006;20:2339-51.
- 89 Tanaka S, Takahashi N, Udagawa N *et al.* Macrophage colony-stimulating factor is indispensable for both proliferation and differentiation of osteoclast progenitors. *J Clin Invest* 1993;91:257-63.
- 90 Paniagua RT, Chang A, Mariano MM *et al.* c-FMS-mediated differentiation and priming of monocyte lineage cells play a central role in autoimmune arthritis. *Arthritis Res Ther* 2010;12:R32.
- 91 Dewar AL, Cambareri AC, Zannettino AC *et al.* Macrophage colony-stimulating factor receptor c-FMS is a novel target of imatinib. *Blood* 2005;105:3127-32.
- 92 Fitter S, Dewar AL, Kostakis P *et al.* Long-term imatinib therapy promotes bone formation in cml patients. *Blood* 2008;111:2538-47.
- 93 Conway JG, Pink H, Bergquist ML *et al.* Effects of the cFMS kinase inhibitor 5-(3-methoxy-4-((4-methoxybenzyl)oxy)benzyl)pyrimidine-2,4-diamine (GW2580) in normal and arthritic rats. *J Pharmacol Exp Ther* 2008;326:41-50.
- 94 Conway JG, McDonald B, Parham J *et al.* Inhibition of colony-stimulating-factor-1 signaling in vivo with the orally bioavailable cFMS kinase inhibitor GW2580. *Proc Natl Acad Sci USA* 2005;102:16078-83.
- 95 Ohno H, Uemura Y, Murooka H *et al.* The orally-active and selective c-Fms tyrosine kinase inhibitor Ki20227 inhibits disease progression in a collagen-induced arthritis mouse model. *Eur J Immunol* 2008;38:283-91.
- 96 Kitaura H, Zhou P, Kim HJ *et al.* M-CSF mediates TNF-induced inflammatory osteolysis. *J Clin Invest* 2005;115:3418-27.
- 97 Kimura K, Kitaura H, Fujii T, Hakami ZW, Takano-Yamamoto T. Anti-c-FMS antibody inhibits lipopolysaccharide-induced osteoclastogenesis in vivo. *FEMS Immunol Med Microbiol* 2012;64:219-27.



- 98 Toh M-L, Bonnefoy J-Y, Accart N *et al.* Colony stimulating factor 1 receptor inhibition has anti-inflammatory and potent early onset bone and cartilage protective effects. *Arthritis Rheum* 2011;63:S444.
- 99 Lenzo JC, Turner AL, Cook AD *et al.* Control of macrophage lineage populations by CSF-1 receptor and GM-CSF in homeostasis and inflammation. *Immunol Cell Biol* 2012;90:429–40.
- 100 MacDonald KP, Palmer JS, Cronau S *et al.* An antibody against the colony-stimulating factor 1 receptor depletes the resident subset of monocytes and tissue- and tumor-associated macrophages but does not inhibit inflammation. *Blood* 2010;116:3955–63.
- 101 Campbell IK, Rich MJ, Bischof RJ, Hamilton JA. The colony-stimulating factors and collagen-induced arthritis: exacerbation of disease by m-CSF and G-CSF and requirement for endogenous M-CSF. *J Leukoc Biol* 2000;68:144–50.
- 102 Hamilton JA. Colony-stimulating factors in inflammation and autoimmunity. *Nat Rev Immunol* 2008;8:533–44.
- 103 Mosser DM, Edwards JP. Exploring the full spectrum of macrophage activation. *Nat Rev Immunol* 2008;8:958–69.
- 104 Khoury M, Louis-Plence P, Escriou V *et al.* Efficient new cationic liposome formulation for systemic delivery of small interfering RNA silencing tumor necrosis factor alpha in experimental arthritis. *Arthritis Rheum* 2006;54:1867–77.
- 105 Caminade AM, Turrin CO, Majoral JP. Dendrimers and DNA: combinations of two special topologies for nanomaterials and biology. *Chemistry* 2008;14:7422–32.
- 106 Menjoge AR, Kannan RM, Tomalia DA. Dendrimer-based drug and imaging conjugates: design considerations for nanomedical applications. *Drug Discov Today* 2010;15:171–85.
- 107 McGowan I, Gomez K, Bruder K *et al.* Phase 1 randomized trial of the vaginal safety and acceptability of SPL7013 gel (VivaGel) in sexually active young women (MTN-004). *AIDS* 2011;25:1057–64.
- 108 Tyssen D, Henderson SA, Johnson A *et al.* Structure activity relationship of dendrimer microbicides with dual action antiviral activity. *PLoS One* 2010;5:e12309.
- 109 Buch MH, Smolen JS, Betteridge N *et al.* Updated consensus statement on the use of rituximab in patients with rheumatoid arthritis. *Ann Rheum Dis* 2011;70:909–20.
- 110 van de Veerdonk FL, Lauwerys B, Marijnissen RJ *et al.* The anti-CD20 antibody rituximab reduces the Th17 cell response. *Arthritis Rheum* 2011;63:1507–16.
- 111 Huang H, Benoist C, Mathis D. Rituximab specifically depletes short-lived autoreactive plasma cells in a mouse model of inflammatory arthritis. *Proc Natl Acad Sci USA* 2010;107:4658–63.
- 112 Vincent C, Nogueira L, Clavel C, Sebbag M, Serre G. Autoantibodies to citrullinated proteins: ACPA. *Autoimmunity* 2005;38:17–24.
- 113 Uysal H, Nandakumar KS, Kessel C *et al.* Antibodies to citrullinated proteins: molecular interactions and arthritogenicity. *Immunol Rev* 2010;233:9–33.
